# Supplementary material for: Growth Arrest-Specific Gene 6 Administration Ameliorates Sepsis-Induced Organ Damage in Mice and Reduces ROS Formation In Vitro
Source: MDPI journal article supplement (doi:10.3390/cells10030602), 2021-03-09
Supplement: s1 [file s1]

## SUPPLEMENTAL MATERIAL

**TableS1. Primers sequence and TaqMan probes.**

| Gene                  | Forward Primers               | Reverse Primer                 |
|-----------------------|-------------------------------|--------------------------------|
| $\beta$ -actin        | 5' tgctgacggccaggatcat 3'     | 5' atctccttctgcatcctgtcgg 3'   |
| Interleukin-1 $\beta$ | 5' gctgtcctgatgagatcc 3'      | 5' catgagtcacagaggatgggctc 3'  |
| Interleukin-6         | 5' gctgggtgacaaccacggccttc 3' | 5' ttctgcaagtgcacatcggtgttc 3' |
| Interleukin-10        | 5' agccttatcggaaatgatccagt 3' | 5' ggcttgtagacaccttggt 3'      |
| TGF- $\beta$          | 5' ctccgtggcttctagtgc 3'      | 5' gccttagttggacaggatctg 3'    |
| MerTK                 | 5' ctctggagtggaggcactg 3'     | 5' atctccagtctgggggtgt 3'      |
| Axl                   | 5' gaactgccaggctcctactct 3'   | 5' ggagtgacacaggtctgtcta 3'    |
| iNOS                  | 5' ccccgctactactccatcag 3'    | 5' ccactgacacttcgcacaaa 3'     |
| Gene                  | TaqMan probe                  | GeneBank                       |
| $\beta$ -actin        | Mm00607939_s1                 | AK07935.1                      |
| TNF $\alpha$          | Mm00443258_m1                 | AK153319.1                     |

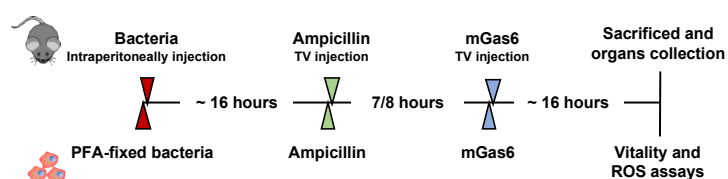

**FigureS1. Timeline of treatments.** Upper layer timeline in vivo and lower layer timeline of treatments in vitro.

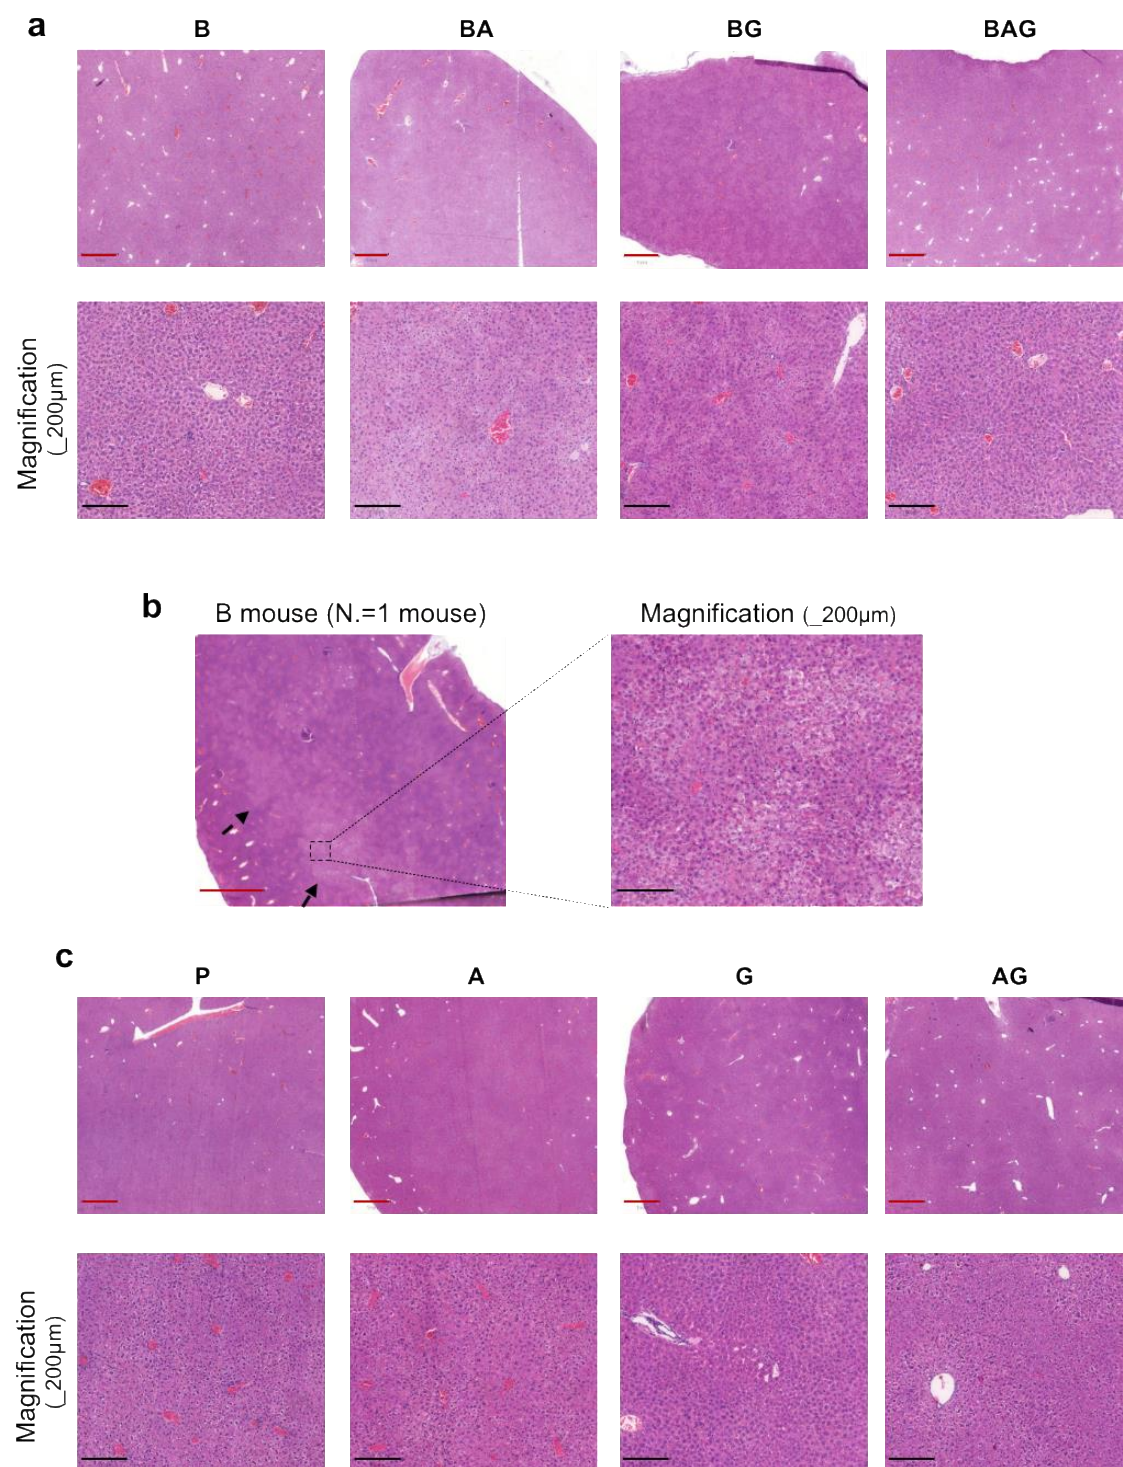

**Figure S2.** Liver histology with hematoxylin-eosin (H&E) staining. **a)** H&E liver staining of septic (B) and septic treated mice (BA, BG, BAG). Upper panels shown no magnified images (red lines = 1 mm), whereas in the lower panels are shown magnified areas (black bars = 200  $\mu$ m). **b)** N.=1 (out of 4) septic mouse without treatment displayed ischemic area in liver (highlighted by black arrows in the left panels, red line = 2 mm, black line = 200  $\mu$ m). **c)** H&E liver staining of control mice (P, A, G and AG) Upper panels shown no magnified images (red lines = 1 mm), whereas in the lower panels are shown magnified areas (black bars = 200  $\mu$ m).

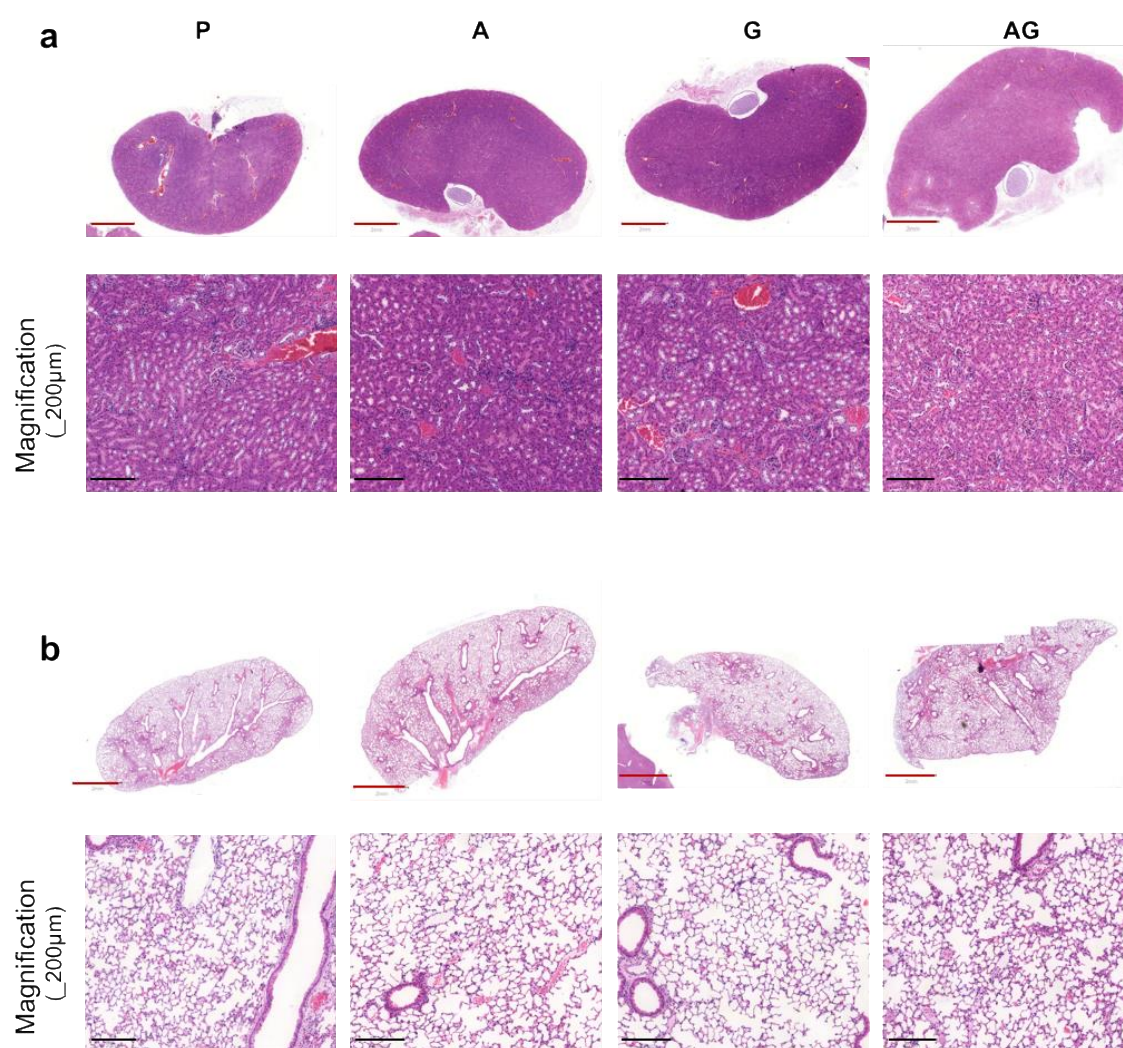

**Figure S3.** Kidney (a) and lung (b) histology with hematoxylin-eosin (H&E) staining for control mice (P, A, G and AG). In upper panels are present the whole organs, while in lower panels are shown magnification. Red lines = 2 mm, black lines = 200  $\mu\text{m}$ .



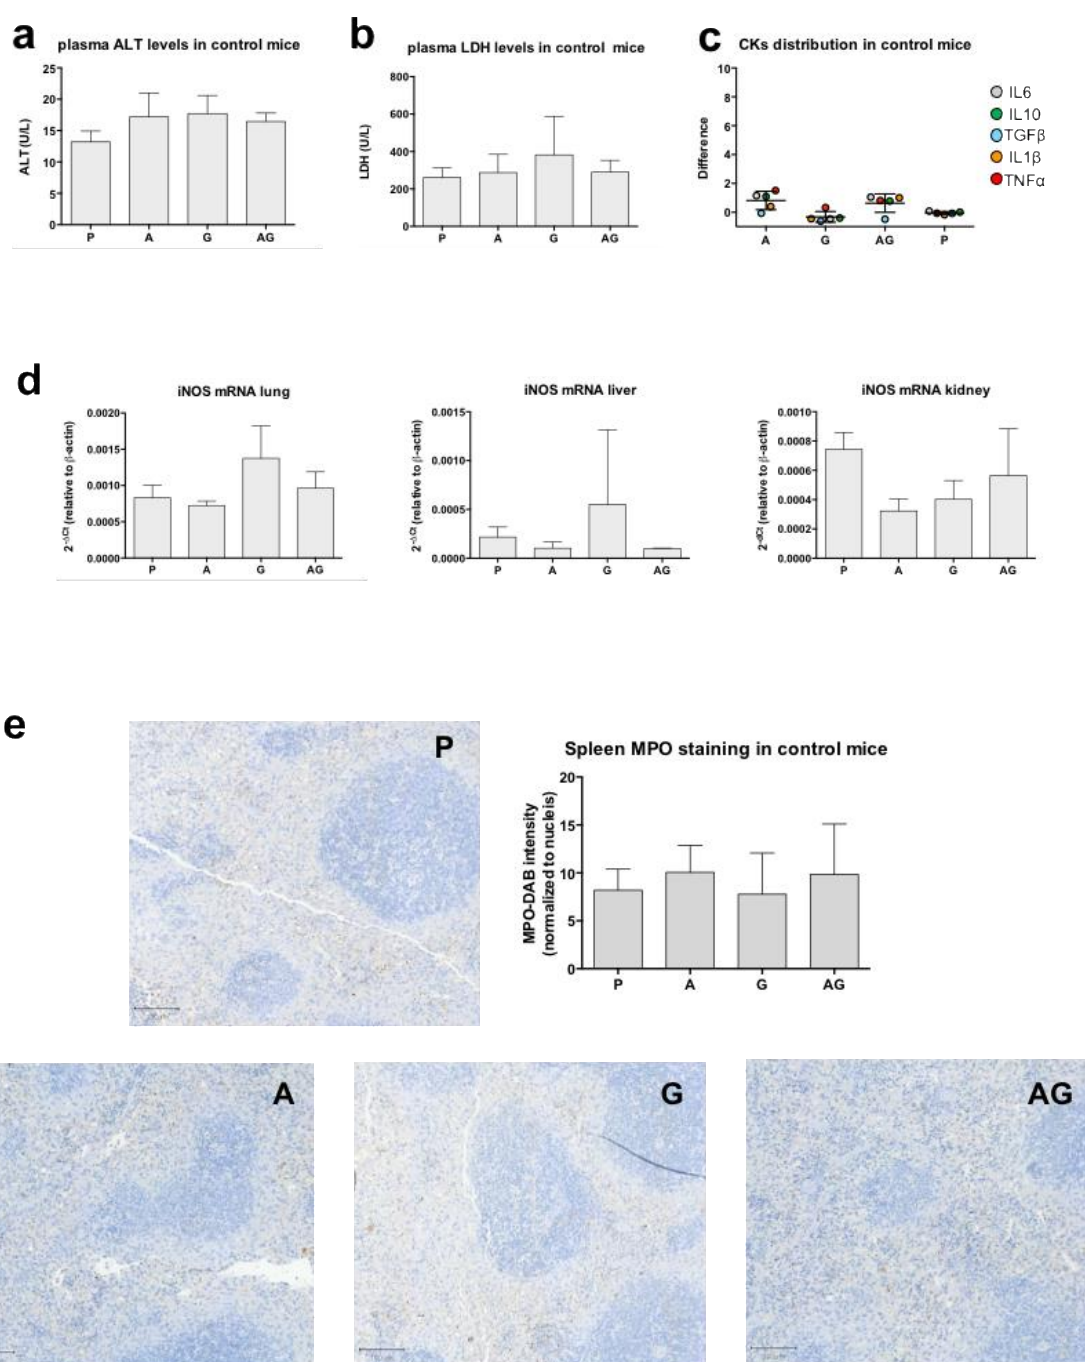

**Figure S4. Organ function of control mice.** Plasma alanine aminotransferase (ALT) (**a**) and lactate dehydrogenase (LDH) (**b**) levels in control groups (P, A, G, AG). (**c**) Representation of the differences in the distribution of cytokines (CKs) among septic/septic-treated group control groups (A, G, AG and P). The pro- and anti-inflammatory cytokines analyzed were interleukin-1β (IL-1β) (orange dots), IL-6 (grey dots), IL-10 (green dots), TGF-β1 (blue dots) and TNF-α (red dots). Each dot includes the above mentioned CKs of liver, kidney and lung. (**d**) Inducible nitric oxide synthase (iNOS) mRNA expression in the kidney, liver and lung from all control groups. (**e**) Representative images and quantification (as MPO intensity/number of nuclei) of myeloperoxidase staining (brown color) in spleen samples from control mice. For all analysis untreated healthy mice (P = PBS, N.=4), treated healthy mice (A = ampicillin, N.=4; G = Gas6, N.=4 and AG = ampicillin + Gas6, N.=4) were included. Values are represented as average ± SD.

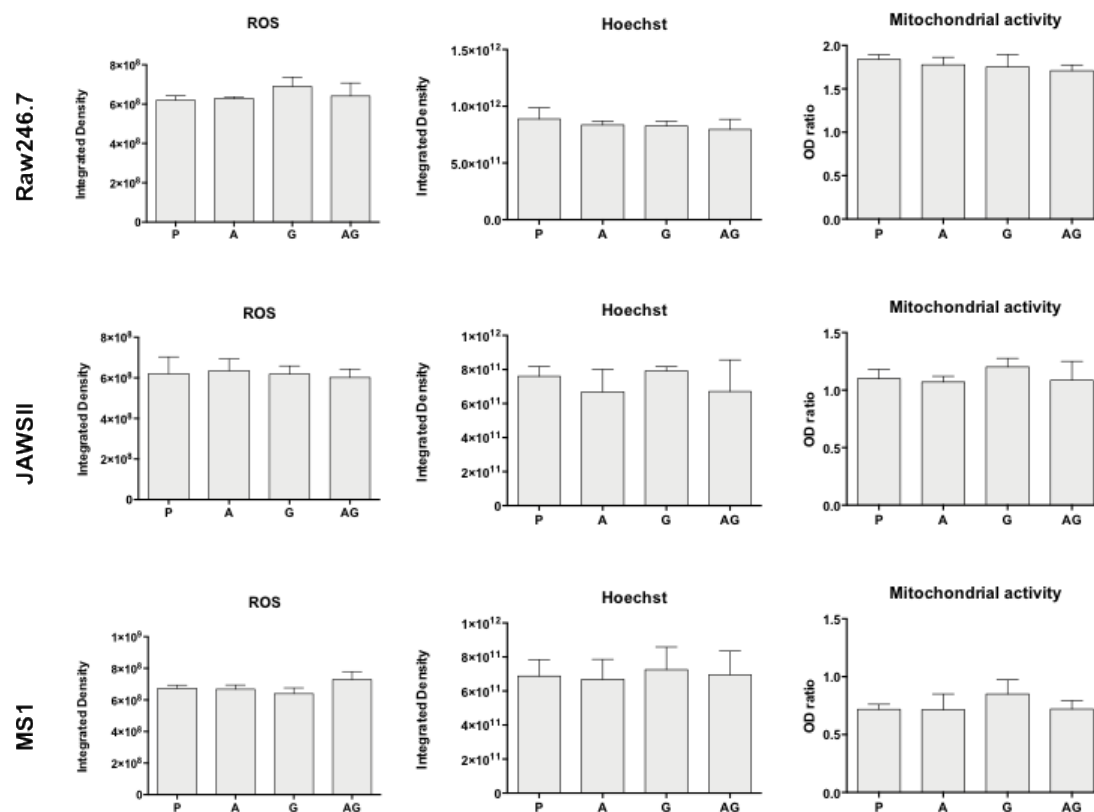

**Figure S5. *In vitro* control treatments.** Reactive oxygen species (ROS) production, cell viability and mitochondrial activity in Raw246.7, JAWSII and MS1 cells. For all analysis untreated healthy mice (P = PBS, N.=4), treated healthy mice (A = ampicillin, N.=4; G = Gas6, N.=4 and AG = ampicillin + Gas6, N.=4) were included. The histograms represent mean values  $\pm$  SD.

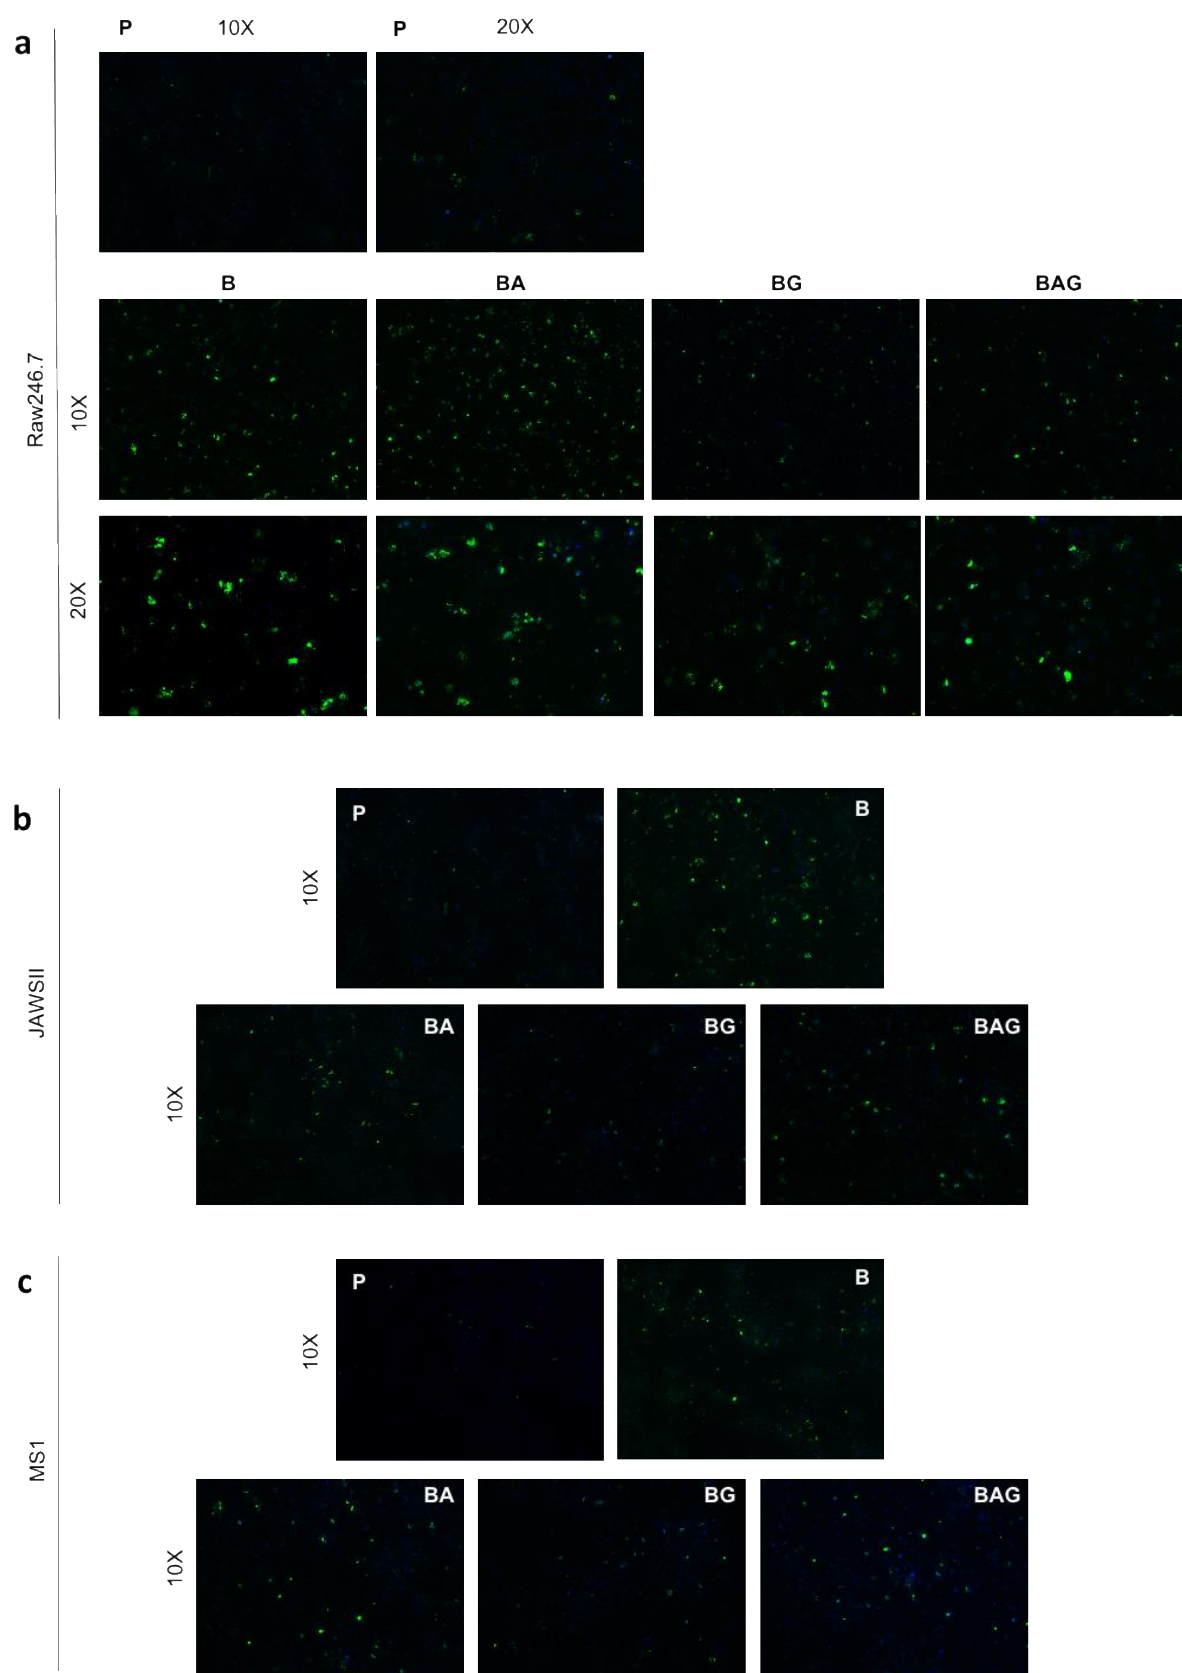

**Figure S6.** Representative fluorescent images of reactive oxygen species (ROS) investigated in Raw246.7 (a), JAWSII (b) and MS1 (c) cell lines treated as follow: P = PBS; B = PFAi-inactivated (PFAi) bacteria; BA = PFAi bacteria + ampicillin; BG = PFAi bacteria + Gas6; BAG = PFAi bacteria+ ampicillin + Gas6.

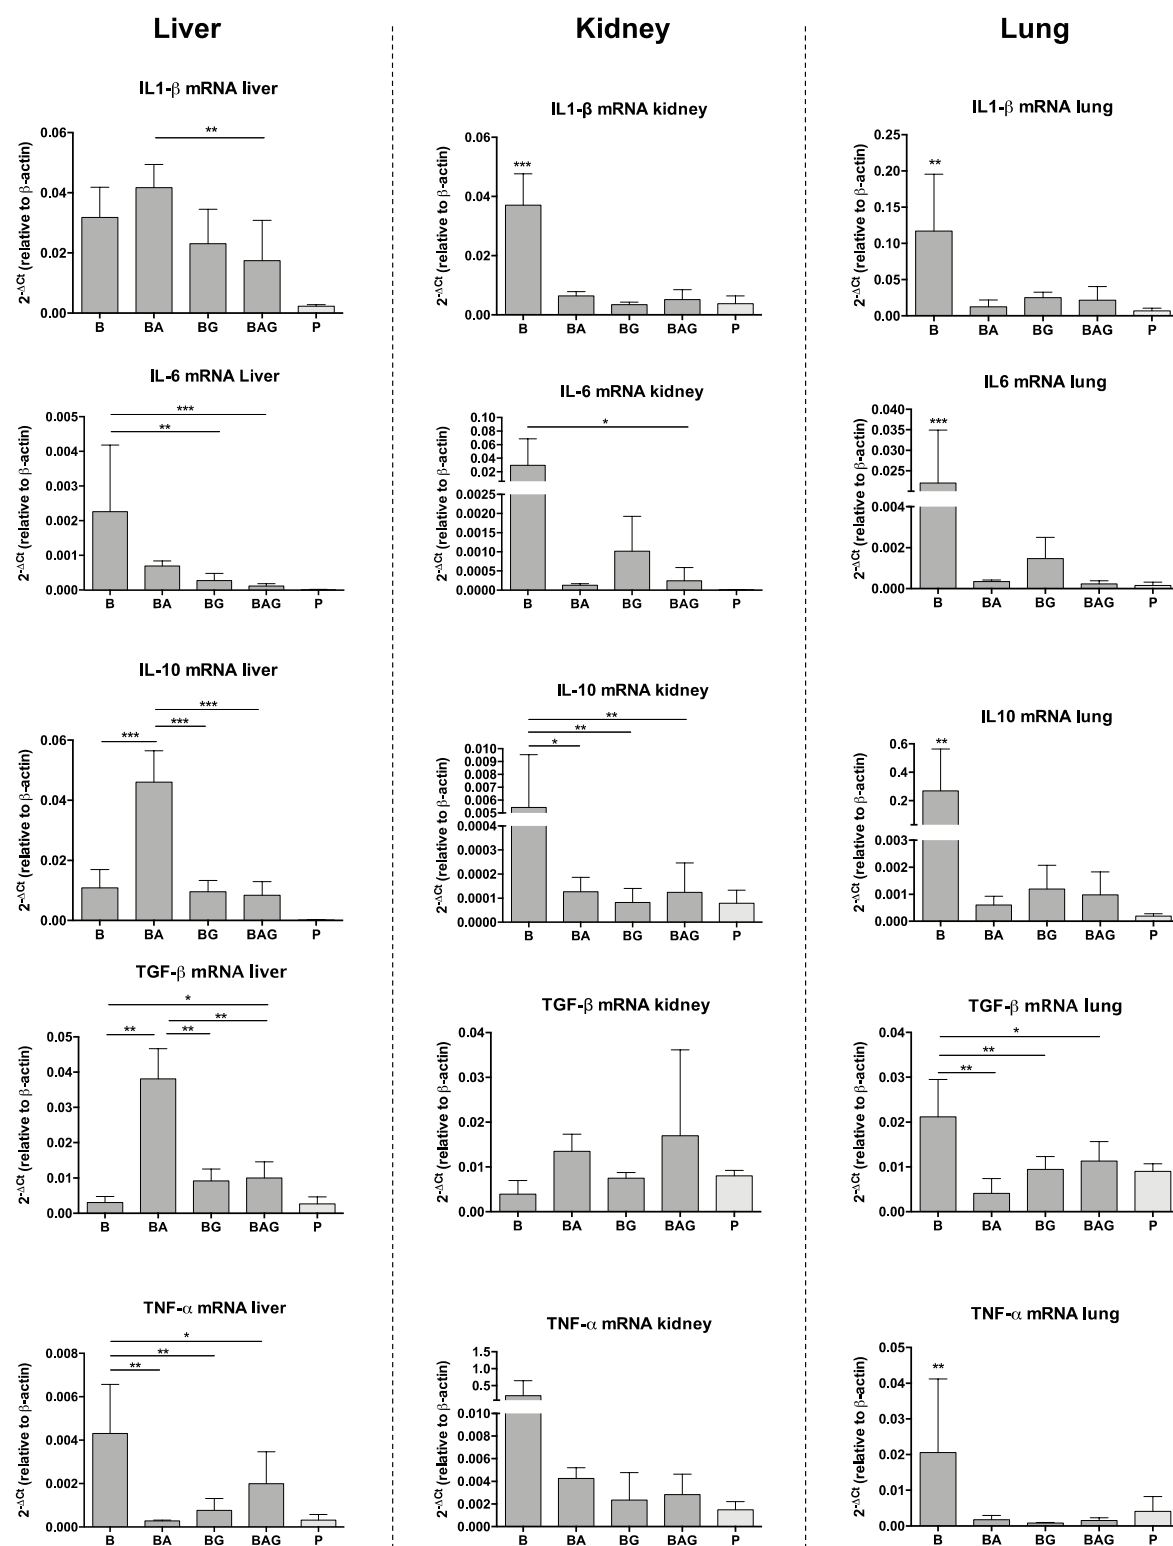

**Figure S7.** Relative expression ( $2^{-\Delta C_t}$ ) of cytokines measured in liver, kidney and lung tissues. The pro- and anti-inflammatory cytokines analyzed were interleukin-1 $\beta$  (IL-1 $\beta$ ), IL-6, IL-10, TGF- $\beta$ 1 and TNF- $\alpha$ . For all analysis septic mice (B = bacteria, septic mice N.=4), septic-treated mice (BA = bacteria + ampicillin, N.=4; BG = bacteria + Gas6, N.=4; BAG = bacteria + ampicillin + Gas6, N.=5) and control mice (P = PBS, N.=4) were included. Values are represented as average  $\pm$  SD. \*  $P < 0.05$ , \*\*  $P < 0.01$ , \*\*\*  $P < 0.005$ .
